# Supplementary material for: Isoeugenol Inhibits Adipogenesis in 3T3-L1 Preadipocytes with Impaired Mitotic Clonal Expansion
Source: MDPI journal article supplement (doi:10.3390/nu16091262), 2024-04-24
Supplement: s1 [file s1]

## Supplementary materials

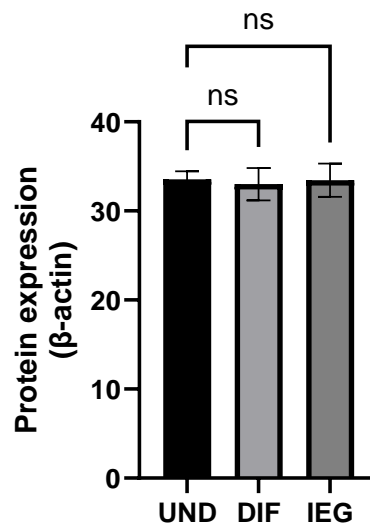

**Figure S1.** Stable protein expression of  $\beta$ -actin (reference gene) in 3T3-L1 preadipocytes and adipocytes at day 8 [41]. UND: preadipocytes, DIF: adipocytes, IEG: DIF+IEG treated adipocytes.

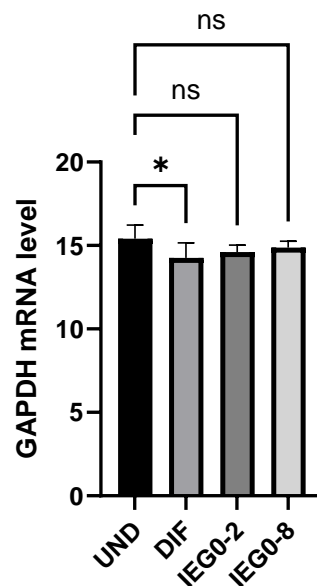

**Figure S2.** Decreased mRNA expression of GAPDH (reference gene) in 3T3-L1 adipocytes at 8 days [41]. UND: preadipocytes, DIF: adipocytes, IEG: DIF+IEG treated adipocytes.

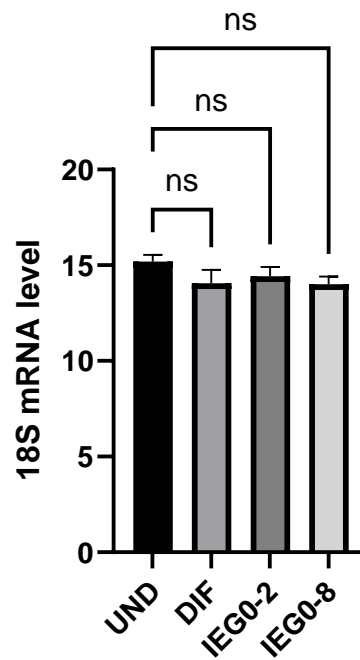

**Figure S3.** Stable mRNA expression of 18S (reference gene) in 3T3-L1 preadipocytes and adipocytes at 8 days [42]. UND: preadipocytes, DIF: adipocytes, IEG: DIF+IEG treated adipocytes.
